# Supplementary material
Source: publisher figshare collection journal article supplement (https://frontiersin.figshare.com/ndownloader/files/35094712)
Supplement: Supplementary file [file 35094712]

**Supplementary materials**

Table S1. Information criteria and entropy for latent class solutions 2 to 5

| Number of<br>Classes | AIC      | BIC      | Entropy | n smallest<br>class |
|----------------------|----------|----------|---------|---------------------|
| 2                    | 2001.707 | 2046.307 | 0.948   | 27                  |
| 3                    | 1945.719 | 2007.044 | 0.92    | 17                  |
| 4                    | 1901.896 | 1979.946 | 0.934   | 15                  |
| 5                    | 1867.587 | 1962.361 | 0.954   | 7                   |

Note: AIC: Akaike Information Criteria BIC: Bayesian Information Criteria

Table S2. Properties of the latent trajectory classes: sociodemographic factors, depression, and prior psychiatric diagnosis

| <b>Sociodemographics</b>              |                |       |                      |                   |                    |                 |
|---------------------------------------|----------------|-------|----------------------|-------------------|--------------------|-----------------|
|                                       | Sex<br>(%male) | age   | Employment<br>(%yes) | partner<br>(%yes) | married<br>(% yes) | child<br>(%yes) |
| Class 1                               | 45.1%          | 38.93 | 59.2%                | 55.9%             | 41.5%              | 47.6%           |
| Class 2                               | 33.9%          | 35.75 | 51.8%                | 26.0%             | 1.4%               | 23.4%           |
| Class 3                               | 52.6%          | 35.86 | 60.8%                | 23.7%             | 8.1%               | 11.1%           |
| <b>Depression (BDI) score</b>         |                |       |                      |                   |                    |                 |
|                                       | t1             | t2    | t3                   | t4                | t5                 |                 |
| Class 1                               | 14.86          | 7.83  | 7.55                 | 6.31              | 4.00               |                 |
| Class 2                               | 28.66          | 26.39 | 20.46                | 25.69             | 19.46              |                 |
| Class 3                               | 21.31          | 20.57 | 17.00                | 22.69             | 12.45              |                 |
| <b>Prior diagnosis (ICD-10 codes)</b> |                |       |                      |                   |                    |                 |
|                                       | F1             | F3    | F4                   | F6                | others             |                 |
| Class 1                               | 25.9%          | 59.6% | 48.8%                | 8.1%              | 6.6%               |                 |
| Class 2                               | 22.8%          | 70.1% | 34.2%                | 42.9%             | 7.6%               |                 |
| Class 3                               | 25.4%          | 68.8% | 37.9%                | 23.0%             | 1.7%               |                 |

(ICD-10) codes: F1\*, substance abuse disorder; F3\*, affective disorder; F4\*, neurotic and acute stress reaction; F6\*, personality disorder.
